# Supplementary material for: Characteristics of convective boundary layer and associated entrainment zone as observed by a ground-based polarization lidar
Source: Copernicus journal article supplement (doi:10.5194/acp-2020-963), 2020-10-26
Supplement: Supplementary file [file acp-2020-963-AC3-supplement.pdf]

*Supplement of*

**Measurement report: Characteristics of clear-day convective boundary layer and associated entrainment zone as observed by a ground-based polarization lidar over Wuhan (30.5° N, 114.4° E)**

**Fuchao Liu et al.**

*Correspondence to:* Fuchao Liu (lfc@whu.edu.cn), Fan Yi (yf@whu.edu.cn)

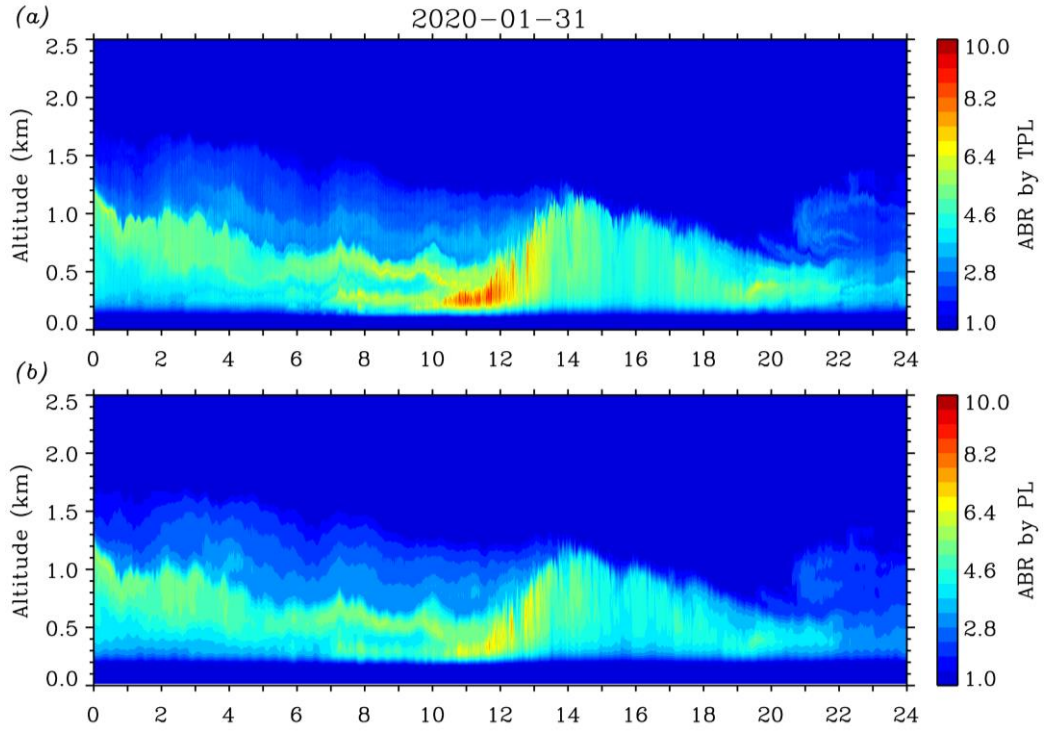

**Figure S1: Contour plots of ABR results obtained by (a) the TPL in this work and (b) another co-located vertically-pointing 532-nm PL (Kong and Yi, 2015) on January 31, 2020. The TPL has 10-s temporal and 6.5-m spatial resolution, while the PL has 60-s temporal and 30-m spatial resolution. The two lidars have a horizontal range of ~15 m apart. Note the concurrent ABR results by these two lidars generally had nearly identical structures and comparable magnitudes in the ABL region.**

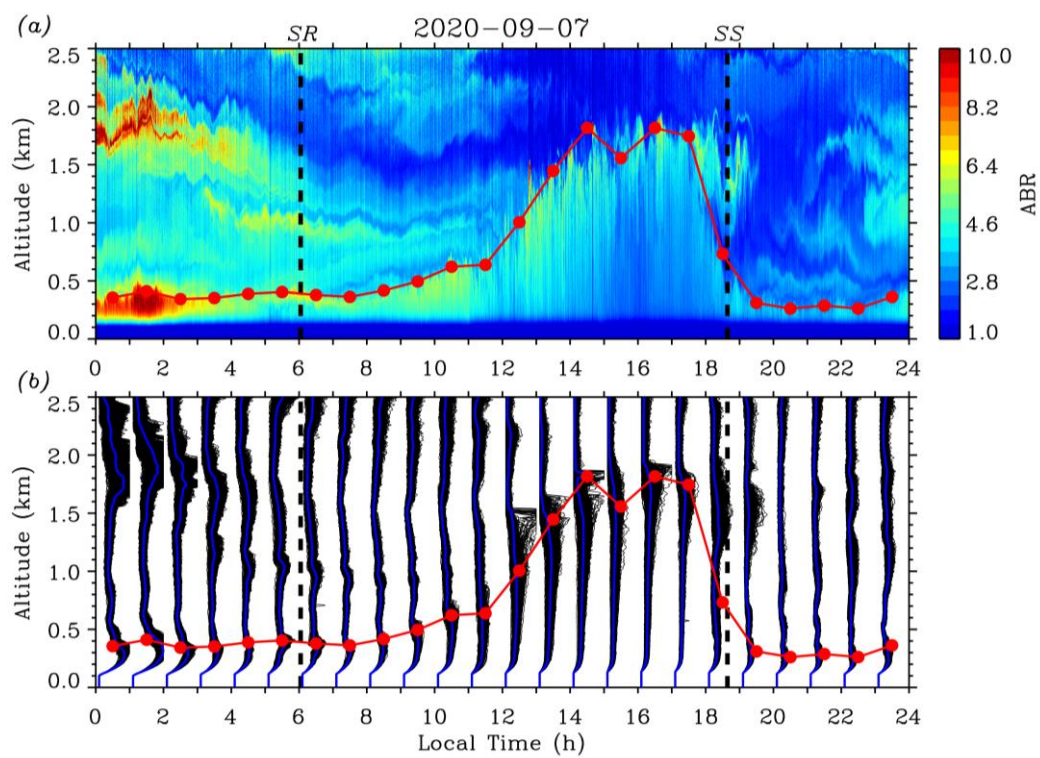

**Figure S2:** Same as Figure 4 but on the day of September 7, 2020.

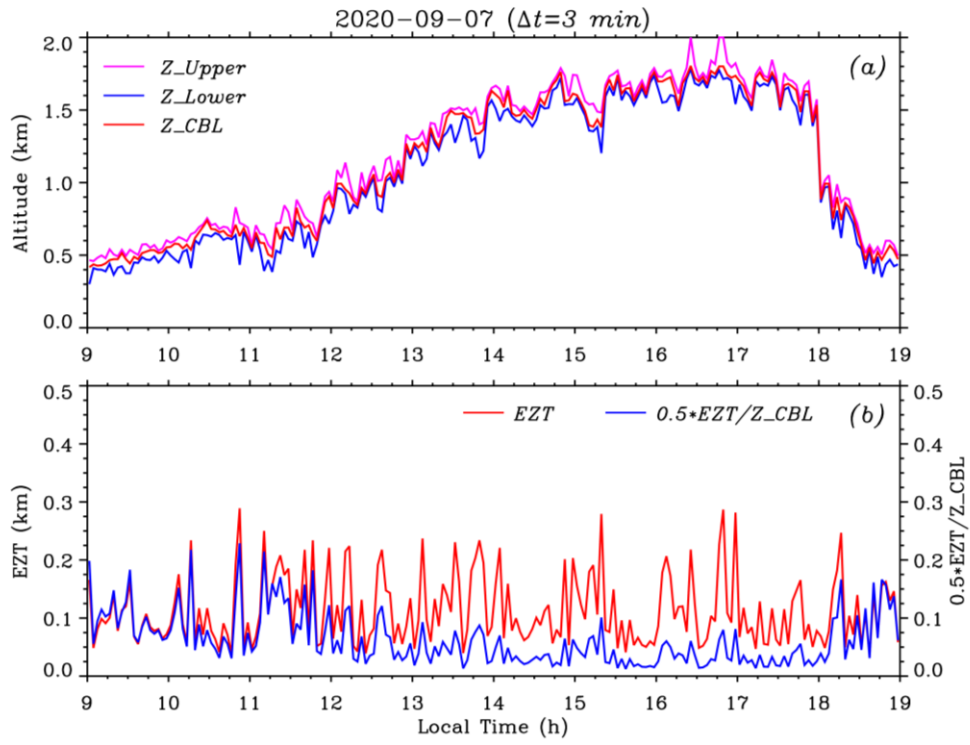

Figure S3: Same as Figure 6 but on the day of September 7, 2020.

**Table S1: Statistics of EZT obtained on September 7, 2020**

| Stage of CBL                      |               | Formation | Growth    | Quasi-stationary | Decay     | Total     |
|-----------------------------------|---------------|-----------|-----------|------------------|-----------|-----------|
| Time Interval (LT)                |               | 0900-1130 | 1130-1430 | 1430-1630        | 1630-1900 | 0900-1900 |
| Statistical<br>data of<br>EZT(km) | <i>min</i>    | 0.039     | 0.039     | 0.041            | 0.034     | 0.034     |
|                                   | <i>max</i>    | 0.289     | 0.237     | 0.279            | 0.287     | 0.289     |
|                                   | <i>mean</i>   | 0.111     | 0.123     | 0.113            | 0.106     | 0.113     |
|                                   | <i>stddev</i> | 0.058     | 0.062     | 0.057            | 0.060     | 0.060     |
| Percentages                       | 0.00-0.05 km  | 10.0      | 6.7       | 5.0              | 10.0      | 8.0       |
| in each<br>EZT<br>subrange        | 0.05-0.10 km  | 46.0      | 45.0      | 47.5             | 44.0      | 45.5      |
|                                   | 0.10-0.15 km  | 20.0      | 18.3      | 22.5             | 30.0      | 22.5      |
| (%)                               | 0.15-0.20 km  | 16.0      | 11.7      | 12.5             | 8.0       | 12.0      |
|                                   | 0.20-0.30 km  | 8.0       | 18.3      | 12.5             | 8.0       | 12.0      |

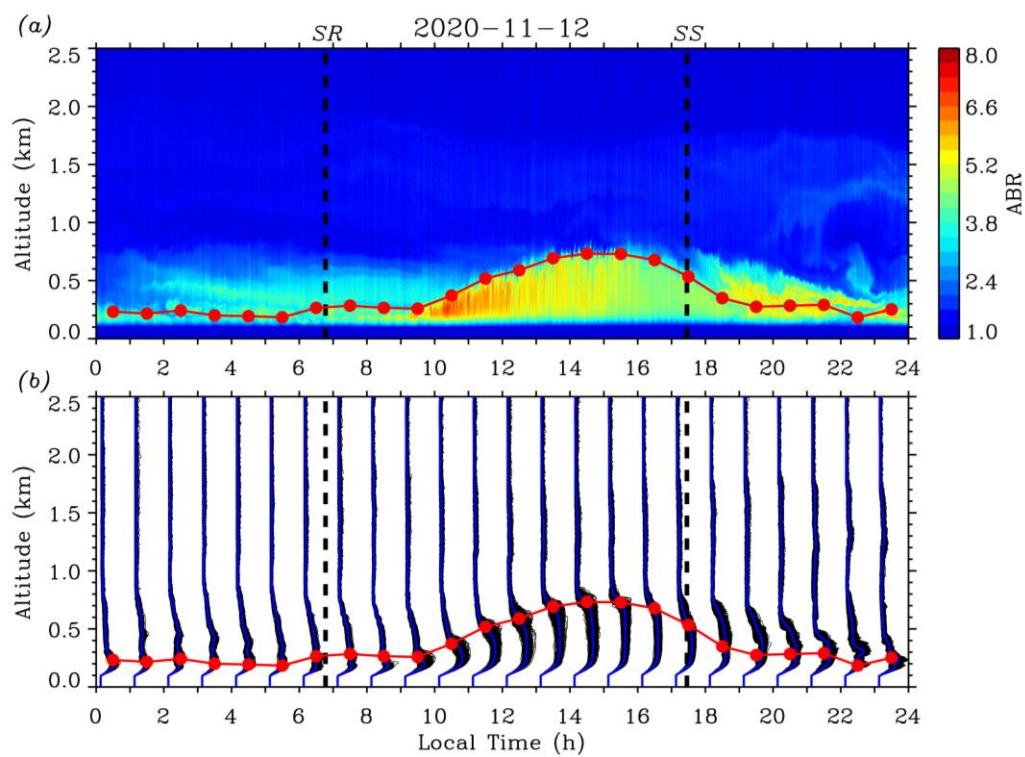

**Figure S4:** Same as Figure 4 but on the day of November 12, 2020.

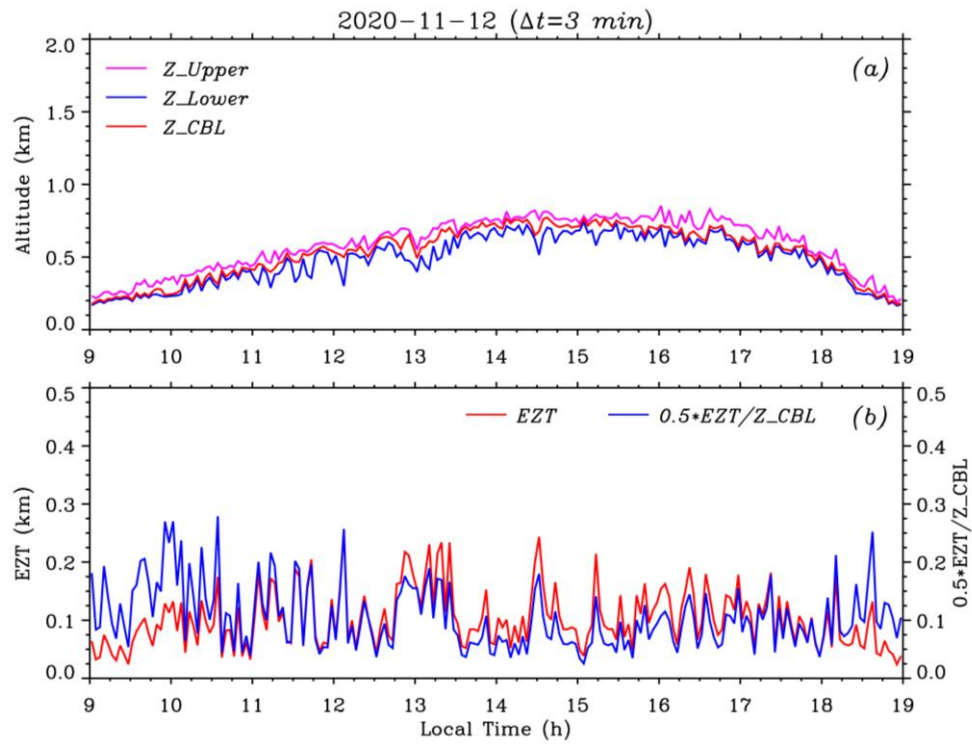

Figure S5: Same as Figure 6 but on the day of November 12, 2020.

**Table S2: Statistics of EZT obtained on November 12, 2020**

| Stage of CBL                      |               | Formation | Growth    | Quasi-stationary | Decay     | Total     |
|-----------------------------------|---------------|-----------|-----------|------------------|-----------|-----------|
| Time Interval (LT)                |               | 0900-1130 | 1130-1430 | 1430-1630        | 1630-1900 | 0900-1900 |
| Statistical<br>data of<br>EZT(km) | <i>min</i>    | 0.024     | 0.043     | 0.039            | 0.024     | 0.024     |
|                                   | <i>max</i>    | 0.182     | 0.257     | 0.244            | 0.182     | 0.257     |
|                                   | <i>mean</i>   | 0.084     | 0.133     | 0.106            | 0.092     | 0.103     |
|                                   | <i>stddev</i> | 0.041     | 0.062     | 0.040            | 0.042     | 0.050     |
| Percentages                       | 0.00-0.05 km  | 22.0      | 5.0       | 5.0              | 14.0      | 11.5      |
| in each                           | 0.05-0.10 km  | 48.0      | 30.0      | 48.3             | 46.0      | 44.0      |
| EZT                               | 0.10-0.15 km  | 22.0      | 22.5      | 28.3             | 32.0      | 26.5      |
| subrange                          | 0.15-0.20 km  | 8.0       | 22.5      | 13.4             | 8.0       | 12.5      |
| (%)                               | 0.20-0.26 km  | 0.0       | 20.0      | 5.0              | 0.0       | 5.5       |

**Table S3: Surface temperature magnitude ranges for each month and the four typical days in 2020 over Wuhan (30.5 °N, 114.4 °E)**

| Month     | Surface temperature magnitude range                       |
|-----------|-----------------------------------------------------------|
| January   | -1-13 °C (0-13 °C for January 31, 2020; <b>Case 1</b> )   |
| February  | 0-25 °C                                                   |
| March     | 3-27 °C                                                   |
| April     | 5-30 °C                                                   |
| May       | 11-35 °C (18-29 °C for May 19, 2020; <b>Case 2</b> )      |
| June      | 21-34 °C                                                  |
| July      | 21-34 °C                                                  |
| August    | 20-37 °C                                                  |
| September | 15-34 °C (21-34 °C for September 7, 2020; <b>Case 3</b> ) |
| October   | 9-26 °C                                                   |
| November  | 1-24 °C (7-22 °C for November 12, 2020; <b>Case 4</b> )   |
| December  | -6-16 °C                                                  |
